# Supplementary material for: IMC10 and LMF1 mediate mitochondrial morphology through mitochondrion–pellicle contact sites in Toxoplasma gondii
Source: PubMed Central journal article supplement (PMC9845740; doi:10.1242/jcs.260083), 2022-11-15
Supplement: joces-135-260083-s1.pdf [file joces-135-260083-s1.pdf]

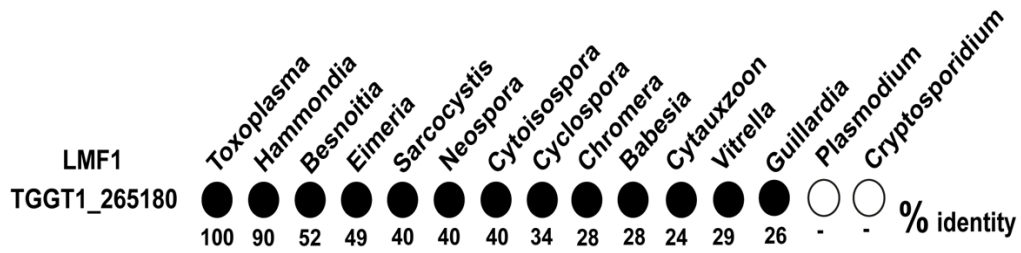

**Fig. S1. Domains and phylogenetic analysis of LMF1.** List of apicomplexan parasites with LMF1 orthologs. Black filled circle means the presence of an orthologue, and a white-filled circle means the absence of an LMF1 orthologue. Below the circles, the percentage of amino acid identity of each homologue found by reciprocal BLASTp.



TGGT1\_213670-Myc. For each of the three dually tagged parasite strains, proteins were immunoprecipitated with either anti-HA or anti-Myc conjugated beads and probed with either Myc (for the interactor) and for HA (for LMF1). B) Intracellular parasites expressing the Myc tagged versions of TGGT1\_231930-myc, TGGT1\_289990-myc and TGGT1\_213670-myc were stained for HA (yellow) and myc (magenta).

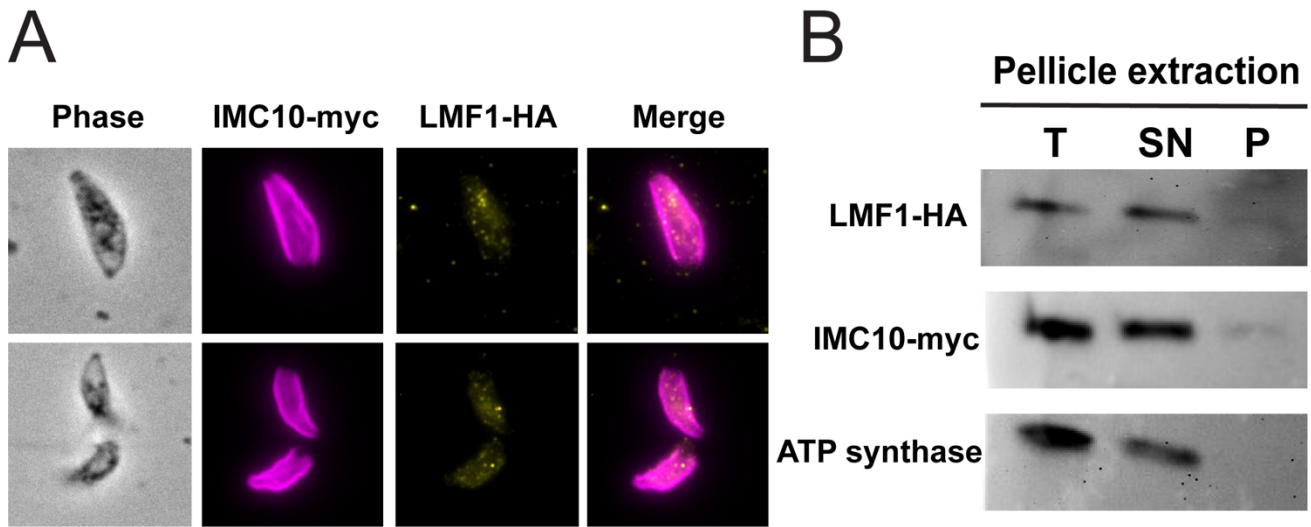

**Fig S3. Localization of LMF1 in isolated pellicles.** Pellicles were extracted from intracellular parasites with deoxycholate (DOC) and used for IFA (A) and Western Blots (B). A) IFA of DOC extracted pellicles showing IMC10 (magenta) and LMF1 (yellow). B) Representative western blots from total parasite extract (T) and both the supernatant (SN) and pellet (P) from the DOC extracted fraction. Western blots were probed for LMF1 (anti- HA), IMC10 (anti-Myc), and the ATP synthase subunit B. Only IMC10 and LMF1 are detected in the pellet fraction, which contains the parasite pellicle.

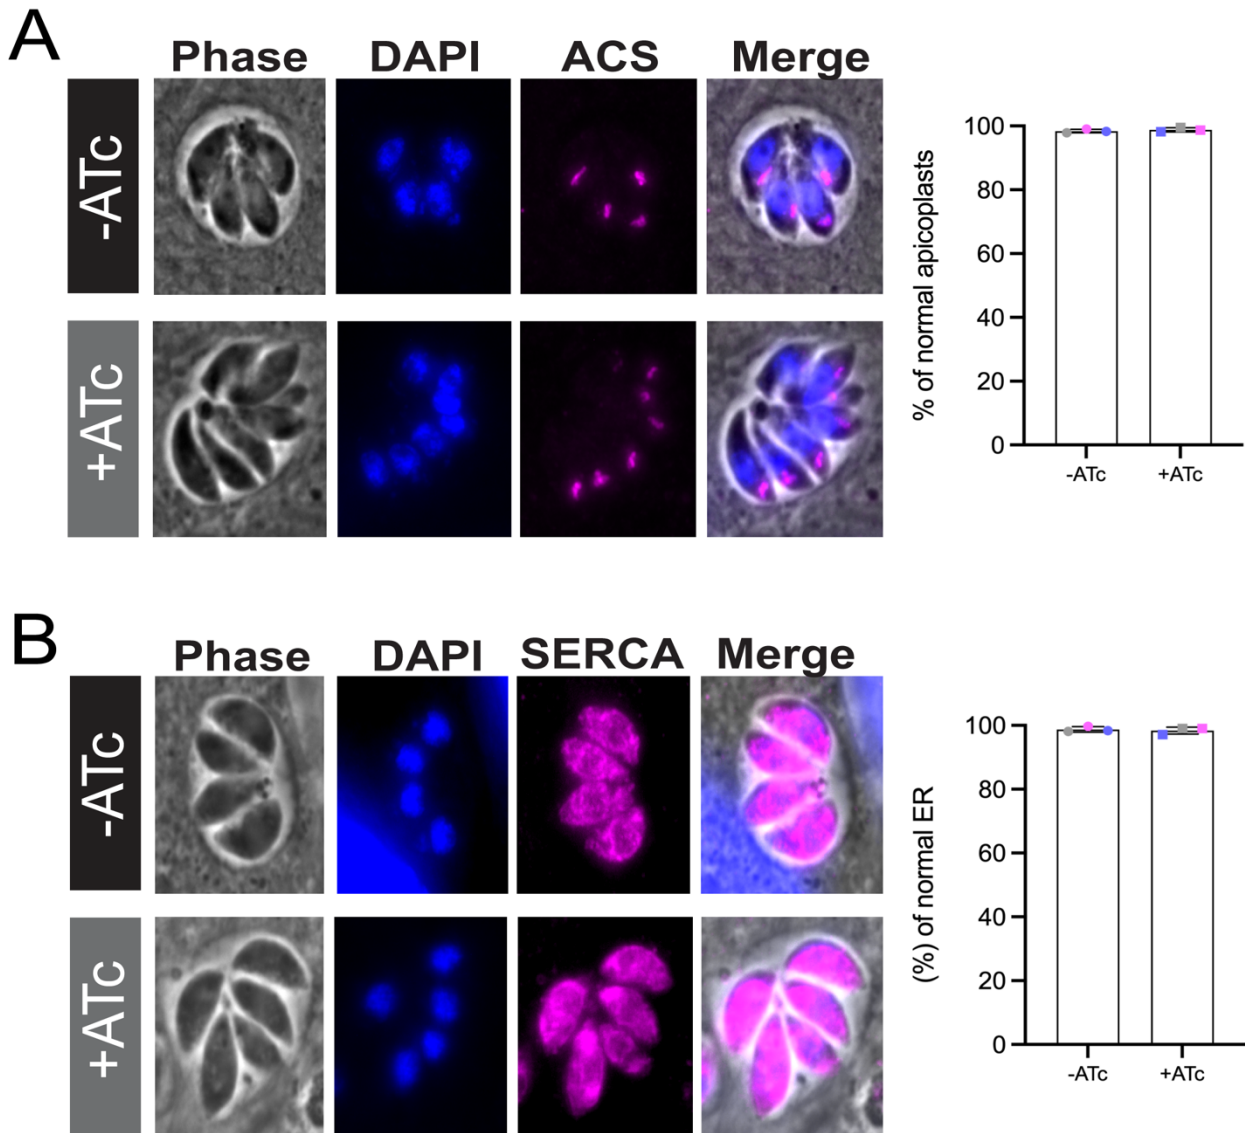

**Fig. S4. IMC10 knockdown does not affect apicoplast or endoplasmic reticulum (ER) morphology.** IFA of parasites stained for DAPI (blue), apicoplast, and ER (magenta) showing the shape of both structures in parasites maintained with and without ATC for 48h. A) Apicoplast morphology at 48h. B) ER morphology at 48h. All graphs represent the percentage of vacuoles with the related phenotype. At least 150 vacuoles per sample were inspected. For all graphs, n = 3. Error bars represent standard deviation.

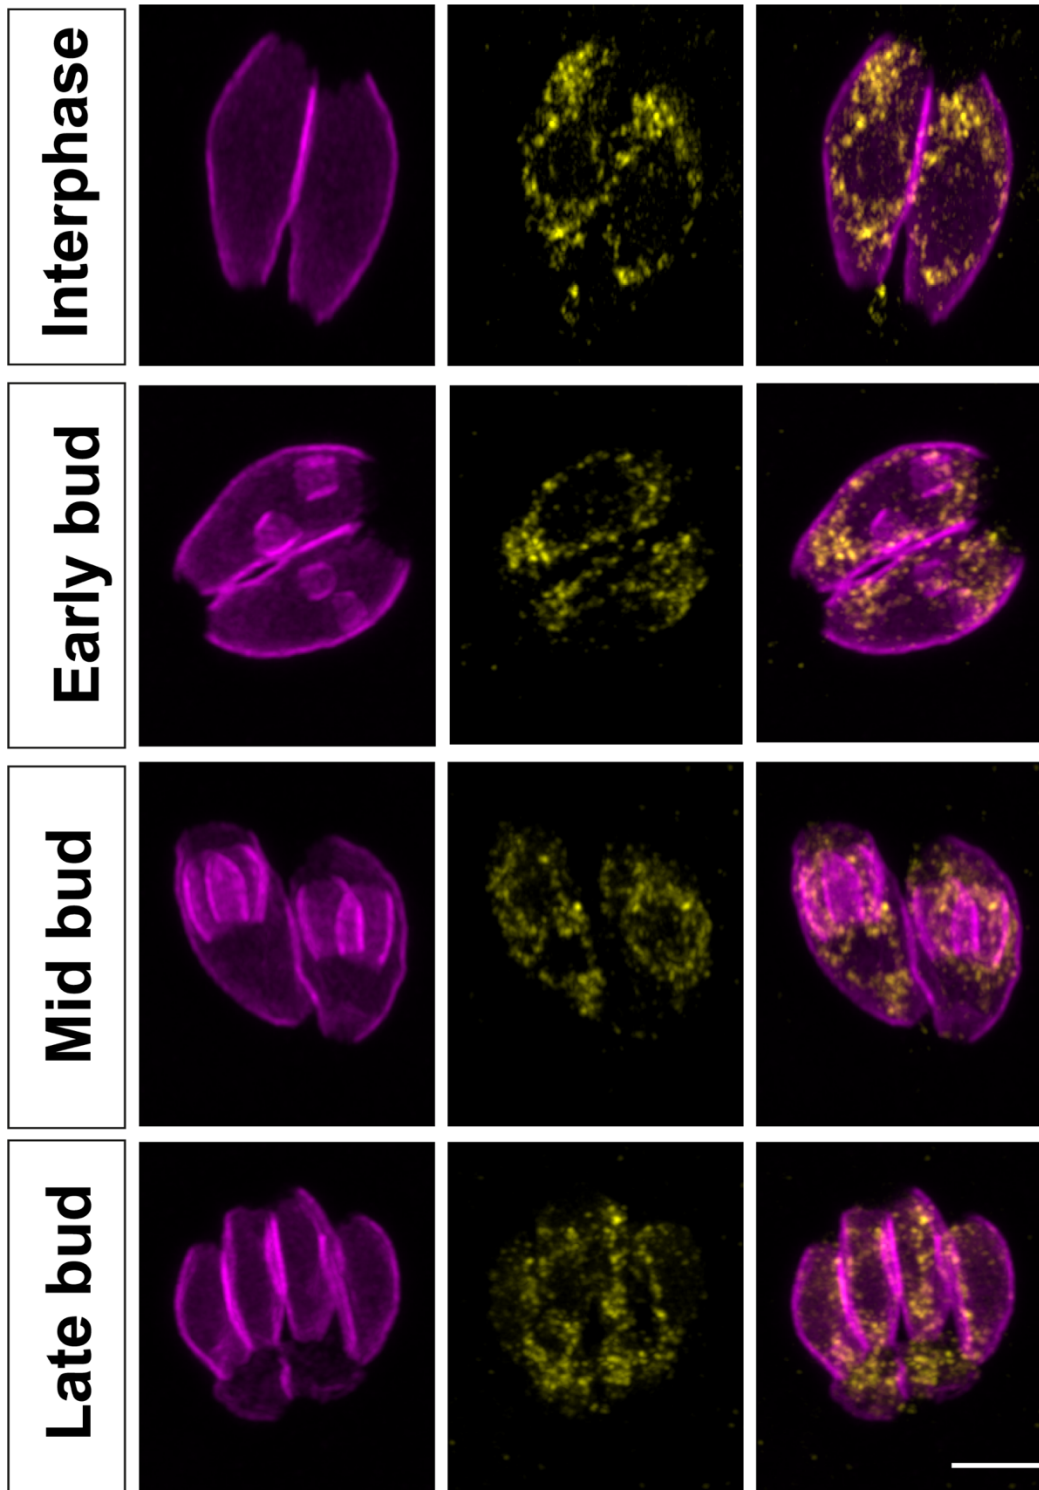

**Fig. S5. LMF1 and IMC10 interact during mitochondrial distribution.** IFA of intracellular parasites stained for LMF1-HA (yellow) and IMC10-Myc (magenta). Scale bar = 5 $\mu$ m. Images were acquired using a Zeiss LSM 800 microscope with Airyscan processing.

### Western blots Figure 1B

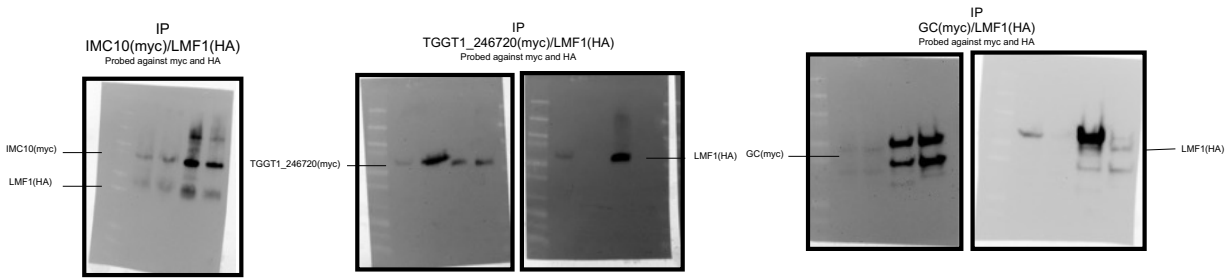

### Western blots Figure S2A

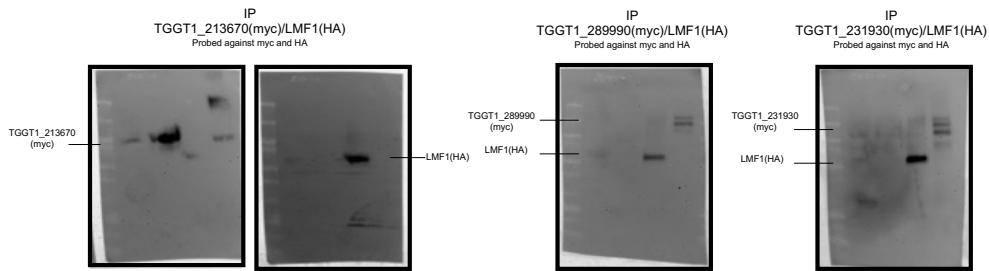

### Western blots Figure 3C and D

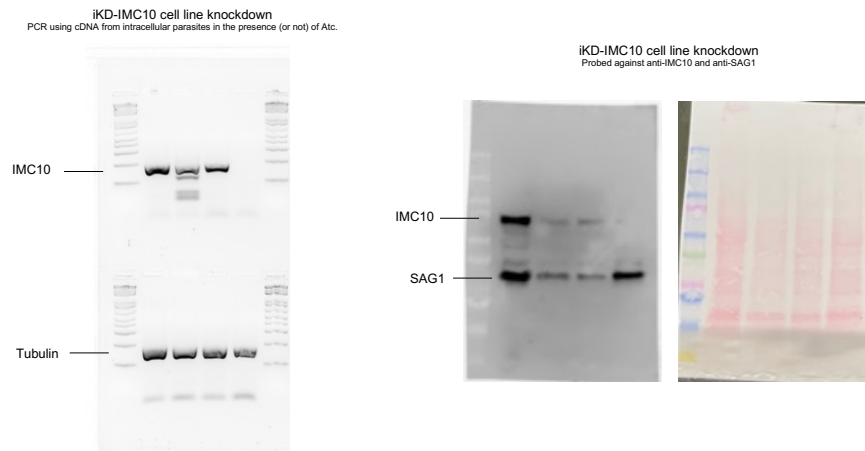

### Western blots Supplemental Figure S3

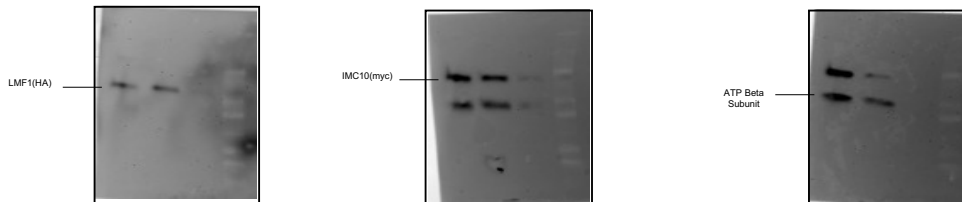

**Fig. S6.** Original images for the western blots showed in this work with molecular weight.



**Table S1. List of candidates LMF1 interactors.** Listed are proteins identified by the yeast two-hybrid (Y2H) screen. Included are the Gene ID, the gene annotation, and the global PrBS score for the likelihood of interaction in Y2H.

| Gene Name (Best Match)                                                        | GenBank ID (NCBI) | ToxoDB ID     | Global PBS |
|-------------------------------------------------------------------------------|-------------------|---------------|------------|
| ALV12                                                                         | XM_002367901.1    | TGME49_230210 | A          |
| SRS20A                                                                        | XM_002369184.2    | TGME49_285870 | A          |
| elongation factor 1-gamma, putative                                           | XM_002371696.2    | TGME49_300140 | A          |
| tRNA ligase class II core domain (G, H, P, S and T) domain-containing protein | XM_002370233.2    | TGME49_295050 | A          |
| MIC2                                                                          | XM_018779175.1    | TGME49_201780 | B          |
| Sel1 repeat-containing protein                                                | XM_018780375.1    | TGME49_233810 | B          |
| guanylyl cyclase                                                              | XM_018781054.1    | TGME49_254370 | B          |
| hypothetical protein                                                          | XM_002366901.2    | TGME49_244530 | B          |
| myosin A                                                                      | XM_002368901.2    | TGME49_235470 | B          |
| phosphoglycerate mutase family protein                                        | XM_018781182.1    | TGME49_258540 | B          |
| clathrin heavy chain, putative                                                | XM_002368438.2    | TGME49_290950 | C          |
| hypothetical protein                                                          | XM_002365609.1    | TGME49_269690 | C          |
| hypothetical protein                                                          | XM_002366715.2    | TGME49_242260 | C          |
| hypothetical protein                                                          | XM_002364969.2    | TGME49_257760 | C          |
| hypothetical protein                                                          | XM_018779329.1    | TGME49_205360 | C          |
| hypothetical protein                                                          | XM_002371294.2    | TGME49_217680 | C          |
| hypothetical protein                                                          | XM_002370465.2    | TGME49_278030 | C          |
| hypothetical protein                                                          | XM_018782763.1    | TGME49_313380 | C          |
| ACC2                                                                          | XM_002370599.2    | TGME49_218560 | D          |
| CDPK7                                                                         | XM_018780218.1    | TGME49_228750 | D          |
| ClpB, putative                                                                | XM_018781733.1    | TGME49_275690 | D          |
| DEAD-family helicase                                                          | XM_002371178.2    | TGME49_298020 | D          |
| DEAD/DEAH box helicase domain-containing protein                              | XM_002370173.1    | TGME49_294350 | D          |
| DNA polymerase family B protein                                               | XM_018782969.1    | TGME49_319860 | D          |
| FRM1                                                                          | XM_018779357.1    | TGME49_206430 | D          |
| GRA5                                                                          | XM_002369230.2    | TGME49_286450 | D          |
| GRA6                                                                          | XM_002371898.2    | TGME49_275440 | D          |
| LisH protein                                                                  | XM_002364639.2    | TGME49_314900 | D          |
| PCI domain-containing protein                                                 | XM_002366378.2    | TGME49_227960 | D          |
| RNA pseudouridine synthase superfamily protein                                | XM_002370387.2    | TGME49_306660 | D          |
| Sec7 domain-containing protein                                                | XM_018781442.1    | TGME49_266830 | D          |
| WD domain, G-beta repeat-containing protein                                   | XM_018781644.1    | TGME49_272040 | D          |
| XPA binding protein 2 family protein                                          | XM_002370276.2    | GME49_305240  | D          |
| crooked neck family 1 protein isoform 2, putative                             | XM_018781534.1    | TGME49_269200 | D          |
| eukaryotic initiation factor-3, subunit 8, putative                           | XM_018782235.1    | TGME49_294620 | D          |
| histidine acid phosphatase superfamily protein                                | XM_018779286.1    | TGME49_204080 | D          |
| hypothetical protein                                                          | XM_002366120.2    | TGME49_224870 | D          |
| hypothetical protein                                                          | XM_002367018.2    | TGME49_246720 | D          |
| hypothetical protein                                                          | XM_002366895.2    | TGME49_244470 | D          |



|                                                          |                |               |   |
|----------------------------------------------------------|----------------|---------------|---|
| hypothetical protein                                     | XM_018780307.1 | TGME49_231930 | D |
| hypothetical protein                                     | XM_018782084.1 | TGME49_289520 | D |
| hypothetical protein                                     | XM_002368014.1 | TGME49_231840 | D |
| hypothetical protein                                     | XM_018779183.1 | TGME49_202040 | D |
| hypothetical protein                                     | XM_018780814.1 | TGME49_247290 | D |
| hypothetical protein                                     | XM_018781060.1 | TGME49_254470 | D |
| hypothetical protein                                     | XM_018781216.1 | TGME49_259720 | D |
| hypothetical protein                                     | XM_018780111.1 | TGME49_225745 | D |
| hypothetical protein                                     | XM_018779615.1 | TGME49_213670 | D |
| hypothetical protein                                     | XM_018781450.1 | TGME49_267020 | D |
| hypothetical protein                                     | XM_018781196.1 | TGME49_258870 | D |
| hypothetical protein                                     | XM_018780237.1 | TGME49_229790 | D |
| hypothetical protein                                     | XM_018780016.1 | TGME49_223760 | D |
| hypothetical protein                                     | XM_002370104.2 | TGME49_293430 | D |
| hypothetical protein                                     | XM_018782540.1 | TGME49_308070 | D |
| hypothetical protein                                     | XM_018781162.1 | TGME49_258070 | D |
| hypothetical protein                                     | XM_002367593.2 | TGME49_203520 | D |
| hypothetical protein                                     | XM_002369737.1 | TGME49_318390 | D |
| hypothetical protein                                     | XM_018781098.1 | TGME49_255300 | D |
| hypothetical protein                                     | XM_002367173.2 | TGME49_248680 | D |
| hypothetical protein                                     | XM_002369325.2 | TGME49_252880 | D |
| hypothetical protein                                     | XM_018781674.1 | TGME49_272695 | D |
| hypothetical protein                                     | XM_002368383.2 | TGME49_289990 | D |
| kinesin heavy chain, putative                            | XM_002365916.1 | TGME49_273560 | D |
| myosin H                                                 | XM_002366784.2 | TGME49_243250 | D |
| root hair defective 3 gtp-binding protein (rhd3) protein | XM_018782846.1 | TGME49_314970 | D |
| tetratricopeptide repeat domain containing protein       | XM_002369289.2 | TGME49_252220 | D |
| tetratricopeptide repeat-containing protein              | XM_002371471.2 | TGME49_295730 | D |
| ubiquitin family protein                                 | XM_002371852.2 | TGME49_304680 | D |
| zinc finger (CCCH type) motif-containing protein         | XM_018780934.1 | TGME49_250690 | D |
| hypothetical protein                                     | XM_002370830.2 | TGME49_215520 | E |

**Table S2. LMF1 interactors identified by immunoprecipitation.** Listed are proteins that had at least four peptides in the LMF1 IP and zero in control (parental parasites). LMF1 is in yellow and IMC10 in pink. Proteins that are known to localize to the pellicle are highlighted in grey. Included are the Gene ID, the gene annotation, and the number of peptides detected by mass spectrometry.

| Gene ID             | Product Description                | Total Peptides |
|---------------------|------------------------------------|----------------|
| <b>TGGT1_265180</b> | <b>LMF1</b>                        | <b>53</b>      |
| TGGT1_286580        | IMC17                              | 40             |
| TGGT1_219320        | GAP50                              | 38             |
| <b>TGGT1_230210</b> | <b>IMC10</b>                       | <b>30</b>      |
| TGGT1_324600        | HSP20                              | 26             |
| TGGT1_222220        | IMC7                               | 23             |
| TGGT1_308860        | AC3                                | 21             |
| TGGT1_232410        | TrxL1                              | 20             |
| TGGT1_258410        | PhIL1                              | 16             |
| TGGT1_248700        | IMC12                              | 13             |
| TGGT1_241170        | hypothetical                       | 12             |
| TGGT1_252360        | ROP24                              | 10             |
| TGGT1_219270        | GAPM2a                             | 9              |
| TGGT1_219310        | DnaK family protein (HSP70)        | 9              |
| TGGT1_249970        | Acylated Pleckstrin-Homology (APH) | 7              |
| TGGT1_262050        | ROP39                              | 6              |
| TGGT1_287500        | T complex chaperonin, putative     | 4              |
| TGGT1_316540        | ISP3                               | 4              |

**Table S3. Sequences of primers were used in this study.** Small caps indicate overhangs with homology to the targeted region for recombination.

| Use                                               | #    | Primers (5'-3')                                                        |
|---------------------------------------------------|------|------------------------------------------------------------------------|
| IMC10 guide RNA targeting                         | P001 | acaacacacaGTTTTAGAGCTAGAAATAGC                                         |
|                                                   | P002 | gggacgtctcAACTTGACATCCCCATTTAC                                         |
| IMC10 C-terminal homology regions for myc tagging | P003 | GCCAGCGGAGTAGGATTGGGCGAAGAGGCACAGATCAGCGCCtta<br>attaaaattggaagtggagg  |
|                                                   | P004 | CATGCCCTGTCCCTAAAAATTAGTTCCCTTTCTCAGTTGTAGGTTT<br>TCCCAGTCACGACG       |
| TGGT1_246720 guide RNA                            | P005 | tggatgtcagGTTTTAGAGCTAGAAATAGC                                         |
|                                                   | P006 | aacctcttcAACTTGACATCCCCATTTAC                                          |
| TGGT1_246720 homology regions for myc tagging     | P007 | TACCACGGCCACGGAAATATCATCACATGGGGAAAATCTTGTttaatt<br>aaaattggaagtggagg  |
|                                                   | P008 | ATCACGCGTCCGGCTGGGTTTCTTTTAACGGAGACATACGAAGTT<br>TCCCAGTCACGACG        |
| ATPase-GC guide RNA                               | P009 | aacgcagaacAACTTGACATCCCCATTTAC                                         |
|                                                   | P010 | gctccagaggGTTTTAGAGCTAGAAATAGC                                         |
| ATPase-GC homology regions for Myc tagging        | P011 | CCTTCGGATATAGGGTCGACACCTGGCTCTGCACTCGGGTCGttaa<br>ttaaattggaagtggagg   |
|                                                   | P012 | GCCTCTGTCTGTCTCGACTGCCCGAAGCGGCAGGACACAGACGT<br>TTCCCAGTCACGACG        |
| TGGT1_213670 guide RNA                            | P013 | ggtgtgttcGTTTTAGAGCTAGAAATAGC                                          |
|                                                   | P014 | cacccccgtcAACTTGACATCCCCATTTAC                                         |
| TGGT1_213670 homology regions for myc tagging     | P015 | GCATGCATCAATGCGGATCTGCTTGCCGGTGCTAAATCCCCAttaatt<br>taaaattggaagtggagg |
|                                                   | P016 | TCTTCAAGTCTAGGTCGGCGAATAGTTTCGTACCACCTAGCATGTT<br>TCCCAGTCACGACG       |
| Guide RNA change using Q5                         | P017 | gcgagggacgGTTTTAGAGCTAGAAATAGC                                         |
|                                                   | P018 | actctgttcAACTTGACATCCCCATTTAC                                          |
| TGGT1_246720 homology regions for Myc tagging     | P019 | CGAGACGAGGAAGACGACGTTTCTCGCTTCCGAAGACGAGttaa<br>ttaaattggaagtggagg     |
|                                                   | P020 | GAACAGAAGACTCCCGTGCACAGCGTCTGCTTCCATCGTGTGTG<br>TTTTCCCAGTCACGACG      |
| Guide RNA change using Q5                         | P021 | gagacgaattGTTTTAGAGCTAGAAATAGC                                         |
|                                                   | P022 | aggtggagtcAACTTGACATCCCCATTTAC                                         |
| TGGT1_246720 homology regions for Myc tagging     | P023 | CTCCGACAGCGGCCTGCAGCAGGATTCTCTGTCAGAACGAGttaa<br>ttaaattggaagtggagg    |
|                                                   | P024 | GGAGACAAGGAGCCCTTGGTACTTTAGTGCCACGCACGCTCAGT<br>TTCCCAGTCACGACG        |
| Guide RNA change using Q5                         | P025 | taataggagtGTTTTAGAGCTAGAAATAGC                                         |
|                                                   | P026 | tcagaggtccAACTTGACATCCCCATTTAC                                         |
|                                                   | P027 | TTCAGGAATCGCCAAACAACATTCCAGTGGCTTTTCTACTcatgttt<br>gcgatccgggg         |
|                                                   | P028 | TGTGTGTGTGCGAAAAGGGAATCGAGGATAGCGTTAGGACGACA<br>GGTCTCTCCGGAGATGA      |
| qPCR IMC10                                        | P029 | AGGAGGTCGAGGTTGTTTCAG                                                  |
|                                                   | P030 | TCAAAGGAGAGCAGTAGGGC                                                   |
| qPCR Tubulin                                      | P031 | TGTCGCTGAGATCACCAACT                                                   |

|                                                      |      |                                           |
|------------------------------------------------------|------|-------------------------------------------|
|                                                      | P032 | AGTCGACGAACTGGATGGTT                      |
| Promoter replacement confirmation                    | P033 | gcctacgtgacttgctgatg                      |
|                                                      | P034 | Gagtggaggattcgcagtct                      |
| Generation of pET-LIC-TEV IMC10 expressing construct | P035 | tattccaatccaatgcaGGAAGTCCACACACAAGGT      |
|                                                      | P036 | ttatccactccaatgttattaGGCGCTGATCTGTGCCTCTT |

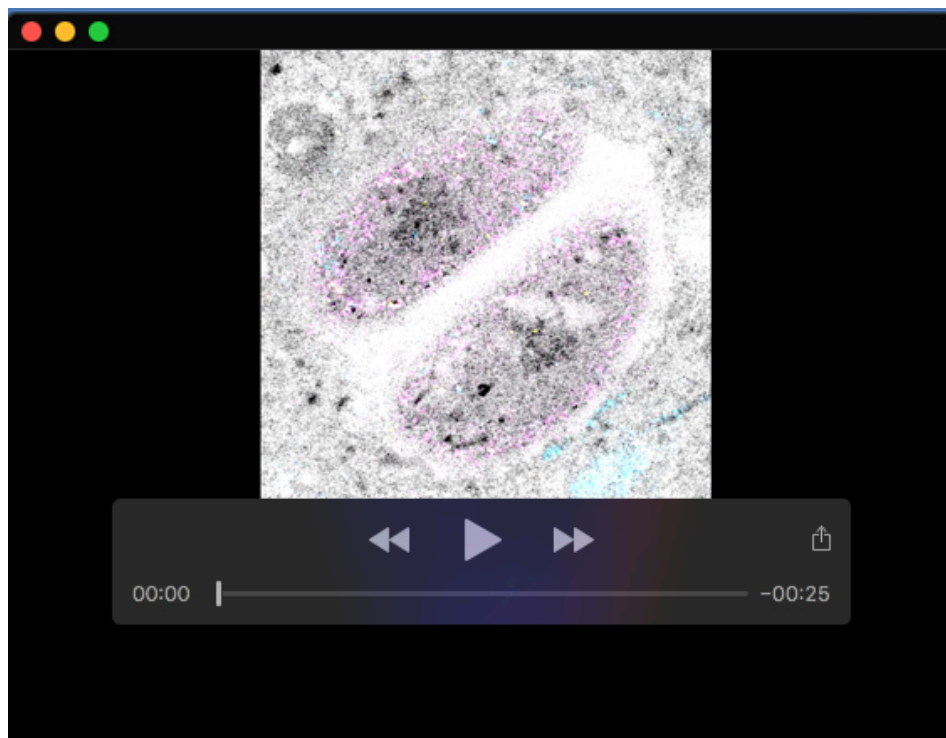

**Movie 1.** Full Z-stacking of expanded parasites showed in Fig 1B. Images were acquired using a Zeiss LSM 900 with Airyscan processing. The movie was edited and processed in FIJI. The IMC is represented in magenta, LMF1 in yellow and Mitochondrion in cyan.

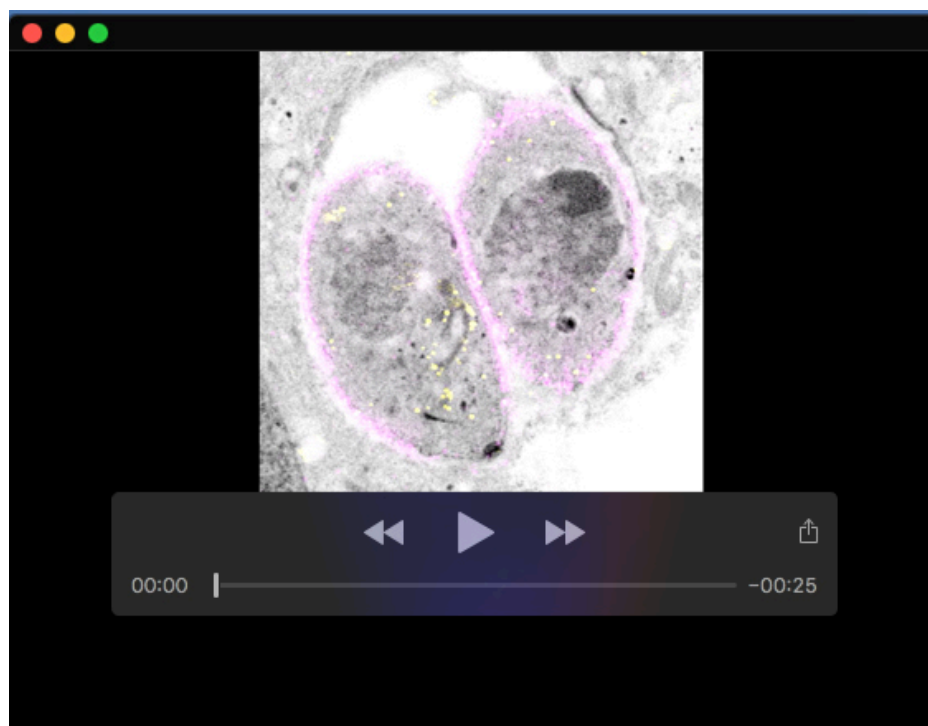

**Movie 2.** Full Z-stacking of expanded parasites during interphase as shown in Fig 7A. Images were acquired using a Zeiss LSM 900 with Airyscan processing. The movie was edited and processed in FIJI. The IMC is represented in magenta, LMF1 in yellow.

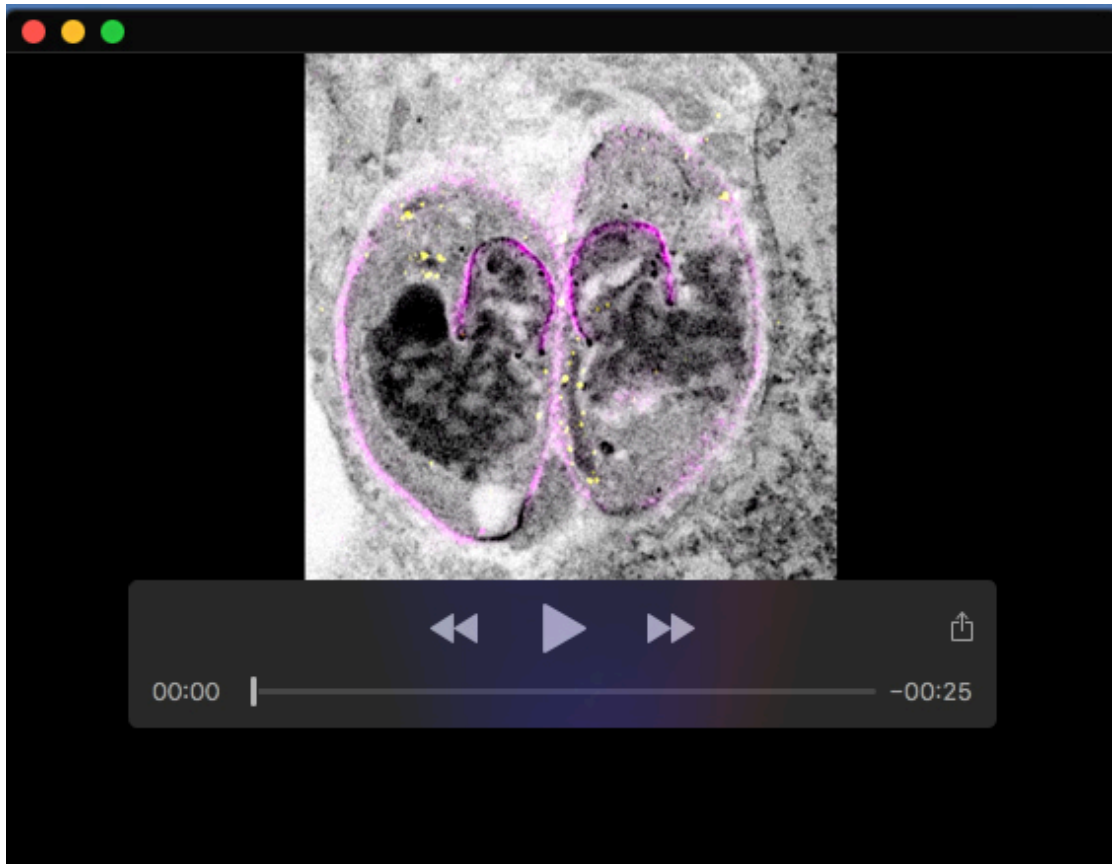

**Movie 3.** Full Z-stacking of expanded parasites undergoing division during an early stage as shown in Fig 7A. Images were acquired using a Zeiss LSM 900 with Airyscan processing. The movie was edited and processed in FIJI. The IMC is represented in magenta, LMF1 in yellow.

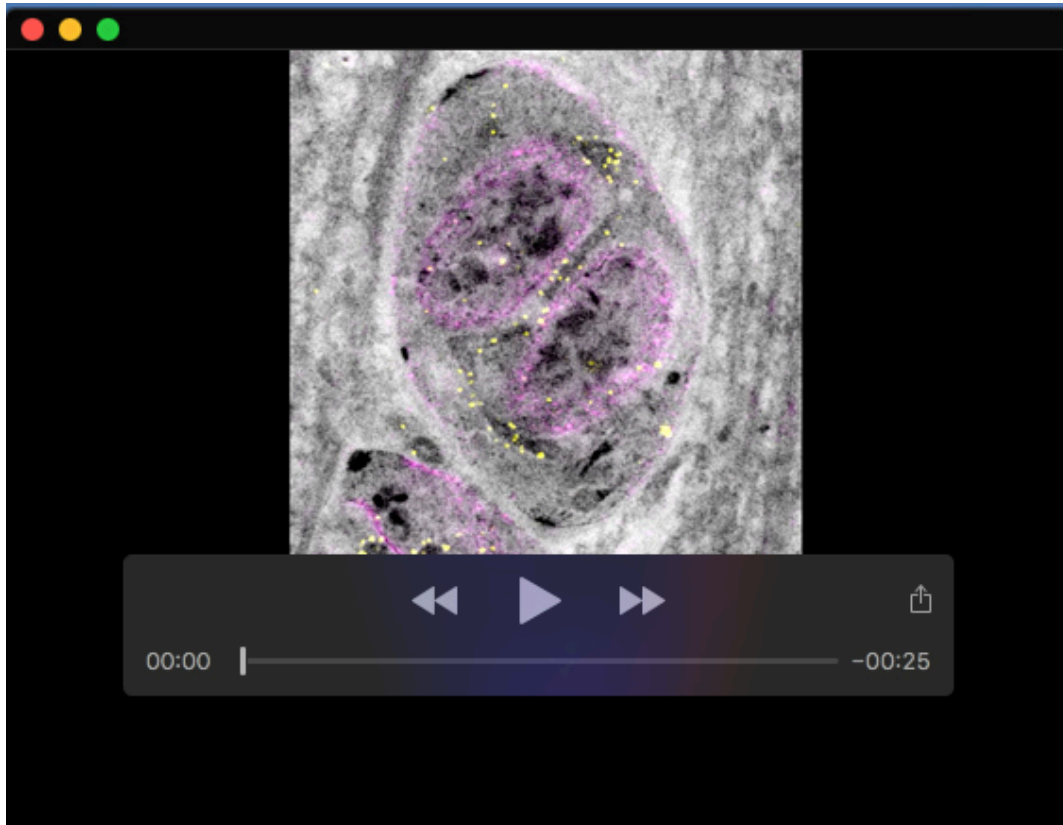

**Movie 4.** Full Z-stacking of expanded parasites undergoing division during a mid-bud stage as shown in Fig 7A. Images were acquired using a Zeiss LSM 900 with Airyscan processing. The movie was edited and processed in FIJI. The IMC is represented in magenta, LMF1 in yellow.



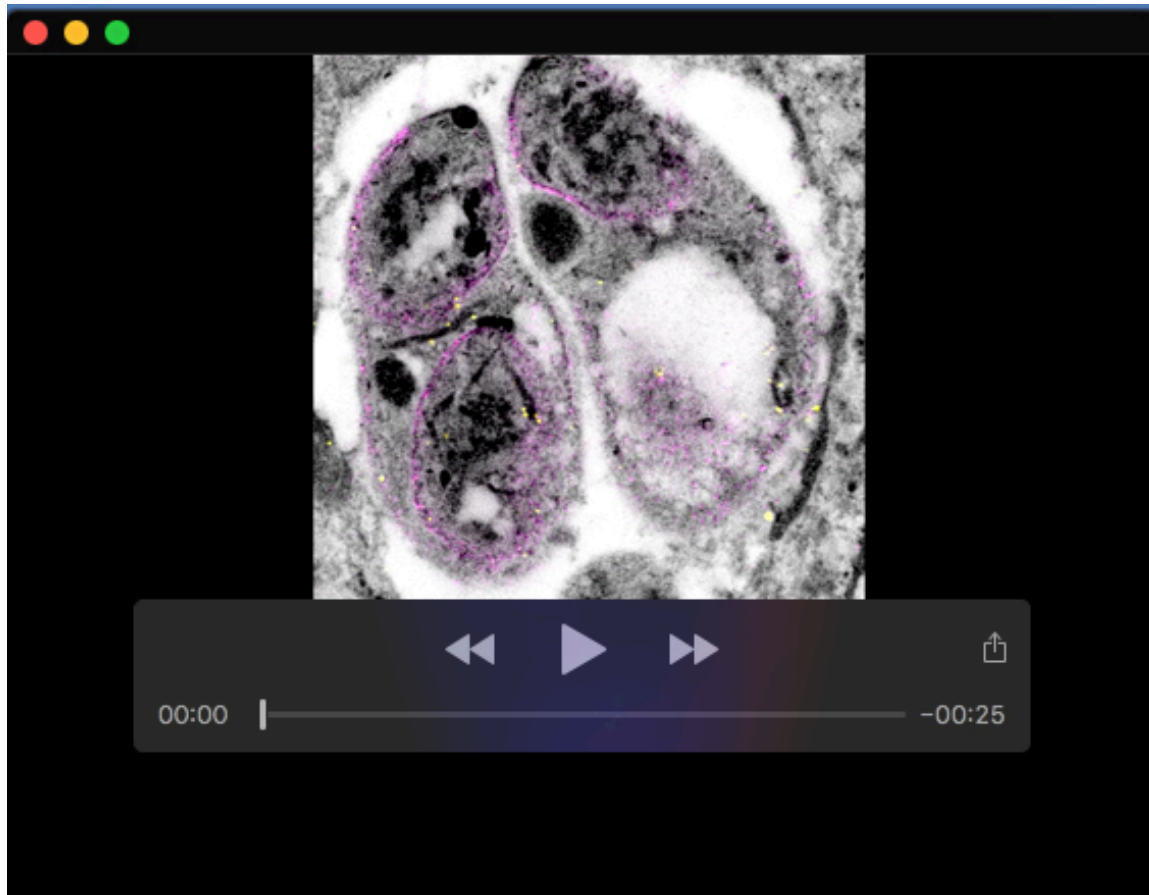

**Movie 5.** Full Z-stacking of expanded parasites undergoing division during a late stage as 96 shown in Fig 7A. Images were acquired using a Zeiss LSM 900 with Airyscan processing. The movie was edited and processed in FIJI. The IMC is represented in magenta, LMF1 in yellow.
